# Supplementary material
Source: PubMed Central journal article supplement (PMC8266661)
Supplement: gkab476_supplemental_file.pdf [file gkab476_supplemental_file.pdf]

**1 Supplementary Figure Legends:**

**2 Figure S1. *Ino80* deletion ESCs.**

3 (A) *Ino80* deletion strategy. (B) Karyotyping of *Ino80*-cKO ESCs. (C-D) *Ino80* expression at the indicated  
4 time points after 4-OHT treatment. *Ino80* mRNA expression was determined by RT-qPCR, first normalized  
5 to *Gapdh* and then normalized to day-0, and plotted as mean  $\pm$  SEM from three replicates (C). *Ino80* protein  
6 expression was determined by western blot (D). Ran was used as a loading control. The experiments were  
7 repeated three times and one representative result was shown. (E) Genome browser track to show INO80  
8 ChIP-seq in WT and *Ino80* deletion cells. ESCs were treated with 4-OHT for 2 days, cultured for another  
9 2 days, and collected for ChIP-seq. (F) Relative live cell number of WT and *Ino80* deletion cells in naïve  
10 (Figure 1C) and primed state (Figure 1E). Cell numbers were normalized to wild type cells. The experiment  
11 was repeated three times. p-values were calculated by student *t*-test: \*\* <0.01.

12

**13 Figure S2. INO80 ChIP-seq.**

14 (A) HA knock-in at the endogenous *Ino80* locus. Upper: targeting strategy; Lower: Western blot using the  
15 HA and INO80 antibody.  $\beta$ -Actin was used as the loading control. The experiments were repeated three  
16 times and one representative result was shown. (B-C) Comparison of ChIP-seq using the HA and INO80  
17 antibody in the *Ino80*-HA ESCs. Cells were cultured in serum/LIF. (B) Venn diagram to show the overlap  
18 of ChIP-seq peaks. (C) Genome browser track view of ChIP-seq signals. (D-F) Comparison of INO80  
19 ChIP-seq by MNase digestion or sonication. (D) Venn diagram to show the overlap of ChIP-seq peaks. (E)  
20 Heatmap to show ChIP-seq signals in MNase-ChIP and Sonication-ChIP shared peaks(left) or MNase-  
21 specific peaks (right). Peaks were sorted by MNase-ChIP-seq signal intensity. (F) Box plots to show  
22 H3K4me3 and H3K27me3 ChIP-seq signals at MNase-specific peaks or MNase-ChIP and Sonication-ChIP  
23 shared peaks. (G) Distribution of INO80 ChIP-seq peaks in the genome in the naïve and primed state. (H)  
24 INO80 occupancy near of *Ino80* deletion-induced DEGs in the naïve and primed state. (I) Top gene  
25 ontology terms enriched in INO80-bound bivalent genes.

26

**27 Figure S3. Establishment of bivalency during the naïve to primed transition.**

28 (A) Metagene plots of normalized H3K27me3 ChIP-seq signals at INO80-bound H3K27me3-only TSSs.  
29 (B-C) Metagene plots to show normalized H3K27me3 (B) and H3K4me3 (C) ChIP-seq signals at INO80-  
30 bound bivalent TSSs in the naïve state. (D) Pie chart of the number of DEGs in INO80-bound bivalent  
31 genes. (E) Violin plots of normalized ChIP-seq signals of H3K4me3 (upper) and H3K27me3 (lower) on  
32 the primed bivalent promoters during the naïve to primed transition (based on public data GSE117896). (F)  
33 Genome browser track of H3K4me3 and H3K27me3 occupancy near T during the naïve to primed transition  
34 (based on public data GSE117896). (G) Genome browser track to show INO80, H3K4me3 and H3K27me3  
35 occupancy near T during the naïve to primed transition (from this study). (H) Relative live cell number of  
36 WT and *Ino80* deletion cells in naïve to primed transition as Figure 4F. Cell numbers were normalized to  
37 wild type cells. The experiment was repeated three times. p-values were calculated by student *t*-test: \*\*\*  
38 <0.001.

39

**40 Figure S4. The requirement for INO80 chromatin remodeling activity.**

41 (A) Strategy to generate the INO80 ATPase-dead mutant cells and Western blot to show the expression of  
42 the Dox-inducible WT and ATPase-dead INO80 expression. *Ino80* conditional deletion ESCs were  
43 transfected with piggyBac vectors expressing Dox-inducible WT or ATPase-dead *Ino80* (KA or EQ mutant),  
44 puromycin selected and cultured in 2iL. *Ino80* deletion was induced by 4-OHT treatment and exogenous  
45 *Ino80* expression was induced by Dox treatment. Cells were harvested and INO80 expression was detected

46 by western blot using the INO80 antibody.  $\beta$ -actin was used for loading control. The experiment was  
47 repeated three times and one representative result was shown. **(B)** Relative live cell number of WT and  
48 *Ino80* deletion cells expressing WT or INO80 ATPase-dead mutant as Figure 5A. Cell numbers were  
49 normalized to wild type cells. The experiment was repeated three times. p-values were calculated by student  
50 *t*-test: \*\*\* <0.001. **(C-E)** *Ino80*-KA/ED knock-in ESCs. ATPase-dead mutations were introduced into the  
51 endogenous *Ino80* in E14Tg2a cells by CRISPR-mediated genome editing. Protein expression of the WT  
52 and mutant INO80 was determined by western blot in WT and *Ino80* homozygous knock-in cells cultured  
53 in 2iL (C). WT and *Ino80*-KA/ED knock-in ESCs were cultured in FA and cell morphology was examined  
54 by imaging (D). The expression of representative bivalent genes was determined by RT-qPCR, first  
55 normalized to *Gapdh* and then normalized to wild-type cells, and plotted as mean  $\pm$  SEM (E) from three  
56 independent experiments. p-values were calculated by student *t*-test: \* <0.05, \*\* <0.01, \*\*\* <0.001. **(F-G)**  
57 Expression of the naïve-specific genes in WT and *Ino80*-KA/ED knock-in ESCs (F) or WT and *Ino80*-  
58 deletion ESCs (G) during the naïve to primed transition. Gene expression was determined by RT-qPCR,  
59 first normalized to *Gapdh* and then normalized to wild-type cells in 2i, and plotted as mean  $\pm$  SEM from  
60 three independent experiments. **(H)** Bioanalyzer gel image to show titrated MNase digestion of WT and  
61 *Ino80* deletion cells cultured in the naïve (2iL) and primed (FAX) state. **(I)** Metagene plots of nucleosome  
62 signals at TSSs of *Ino80*-deletion induced DEGs and non-DEGs in the naïve and primed state. DEGs were  
63 separated into up- and down-regulated genes.

64

#### 65 **Figure S5. INO80 in H2A.Z occupancy.**

66 **(A)** Spearman correlation of the genomic occupancy of H2A.Z and chromatin remodelers. ChIP-seq data  
67 for INO80 and H2A.Z was from this study, and ChIP-seq data for the other chromatin remodelers was from  
68 the public dataset GSE64825. **(B)** H2A.Z ChIP-seq peak distribution in the genome in the naïve and primed  
69 state. **(C)** H2A.Z ChIP-seq signals in the naïve and primed state. **(D-E)** Western blots of H2A.Z in WT and  
70 *Ino80* deletion cells. Histone H3 was used as a loading control (D). For quantitation, H2A.Z expression was  
71 normalized by H3 and then to wild-type cells in the naïve state by ImageJ (E). The experiment was repeated  
72 three times and one representative result was shown. **(F)** Metagene plot to show normalized H2A.Z ChIP-  
73 seq signals at active promoters and enhancer regions in wild-type and *Ino80* deletion cells in the primed  
74 state. **(G-H)** Metagene (G) and box plots (H) of normalized H2A.Z ChIP-seq signals at the INO80-bound  
75 bivalent promoters in the naïve state in WT and *Ino80* deletion cells. p-value was calculated by Wilcoxon  
76 assigned rank test. **(I-J)** *Ino80* deletion in MEFs. MEFs were treated with DMSO or 4-OHT for 2 days.  
77 Cells were imaged (I) and collected for H2A.Z ChIP-seq at day-4. Normalized H2A.Z ChIP-seq signal at  
78 INO80-bound TSSs was shown in the box plot (J).

79

#### 80 **Figure S6. H2A.Z and bivalency.**

81 **(A)** Overlap between INO80-bound bivalent TSSs and H2A.Z peaks in the primed state. **(B)** Violin plot of  
82 normalized H2A.Z ChIP-seq signals at promoters of INO80-bound active, INO80-bound bivalent and non-  
83 INO80-bound gene promoters in the primed state. **(C)** Strategy of *H2az1/H2az2* inducible deletion in  
84 *Rosa26::Cre-ERT2* ESCs. **(D)** Expression of H2A.Z in WT and *H2az1/H2az2* deletion ESCs. *H2az1*-  
85 *cKO/H2az2-KO* ESCs were treated with DMSO or 4-OHT. H2A.Z mRNA expression was determined by  
86 RT-qPCR, first normalized by *Gapdh* and then normalized to wild-type cells, and plotted as mean  $\pm$  SEM  
87 from three replicates. **(E)** H2A.Z protein expression was determined by western blot.  $\beta$ -actin and histone  
88 H3 were used as loading controls. **(F)** MA analysis to show changes in H3K27me3 occupancy at INO80-  
89 bound bivalent TSSs in WT and *H2az1-cKO/H2az2-KO* ESCs.

90

#### 91 **Figure S7. INO80 and H2A.Z regulate PRC2.**

92 **(A-B)** Western blots to show protein levels of H2A.Z, PRC2 components SUZ12 and EZH2 in WT and  
93 *Ino80* deletion (A) and H2A.Z deletion cells (B) in the primed state.  $\beta$ -actin was used as loading control.  
94 The experiment was repeated three times and one representative result was shown. **(C)** Venn diagram to  
95 show the overlap of H2AZ peaks in WT, *Eed*-KO and *Ezh2*-KO ESCs. Cells were cultured in FAX and  
96 collected for H2A.Z ChIP-seq. **(D)** Box plot of normalized H2A.Z ChIP-seq signals of all H2A.Z peaks in  
97 (C). **(E)** Heatmap of normalized H2A.Z ChIP-seq signals at the primed bivalent promoters in WT, *Eed*-KO  
98 and *Ezh2*-KO ESCs. **(F-G)** ChIP-qPCRs to show H2A.Z (F) and SUZ12 (G) at representative bivalent gene  
99 promoters in *Ino80* deletion cells expressing WT and ATPase-dead mutant INO80 as in Figure 5B. Fold  
100 enrichment was plotted as mean  $\pm$  SEM and p-values were calculated by student *t*-test: \* <0.05, \*\* <0.01,  
101 \*\*\* <0.001. The experiment was repeated twice and shown as exp1 and exp2.

102102

### 103 **Supplemental Tables**

104 **Table S1: Antibodies used in this study.**

105 **Table S2: Primers for RT-qPCR, ChIP-qPCR and oligos for genome targeting.**

106 **Table S3: Software and algorithms used for data analysis.**

# Figure S1

**A**

INO80 Conditional Knock-out design

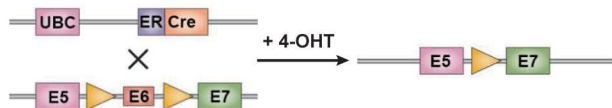**B**

INO80 flox/flox Ubc-Cre-ERT2-CKO1

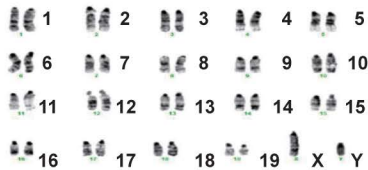**C**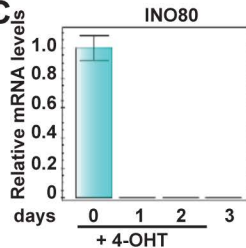**D**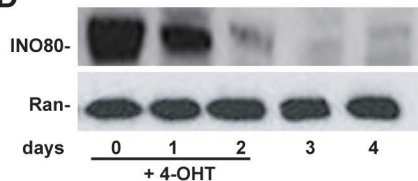**E**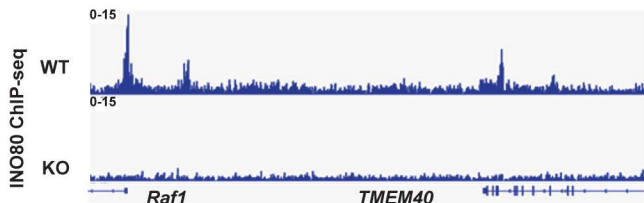**F**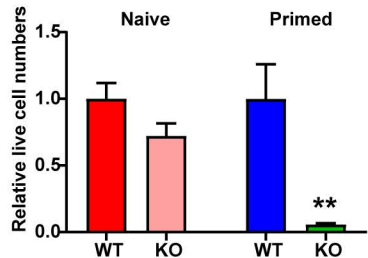

**Figure S2**

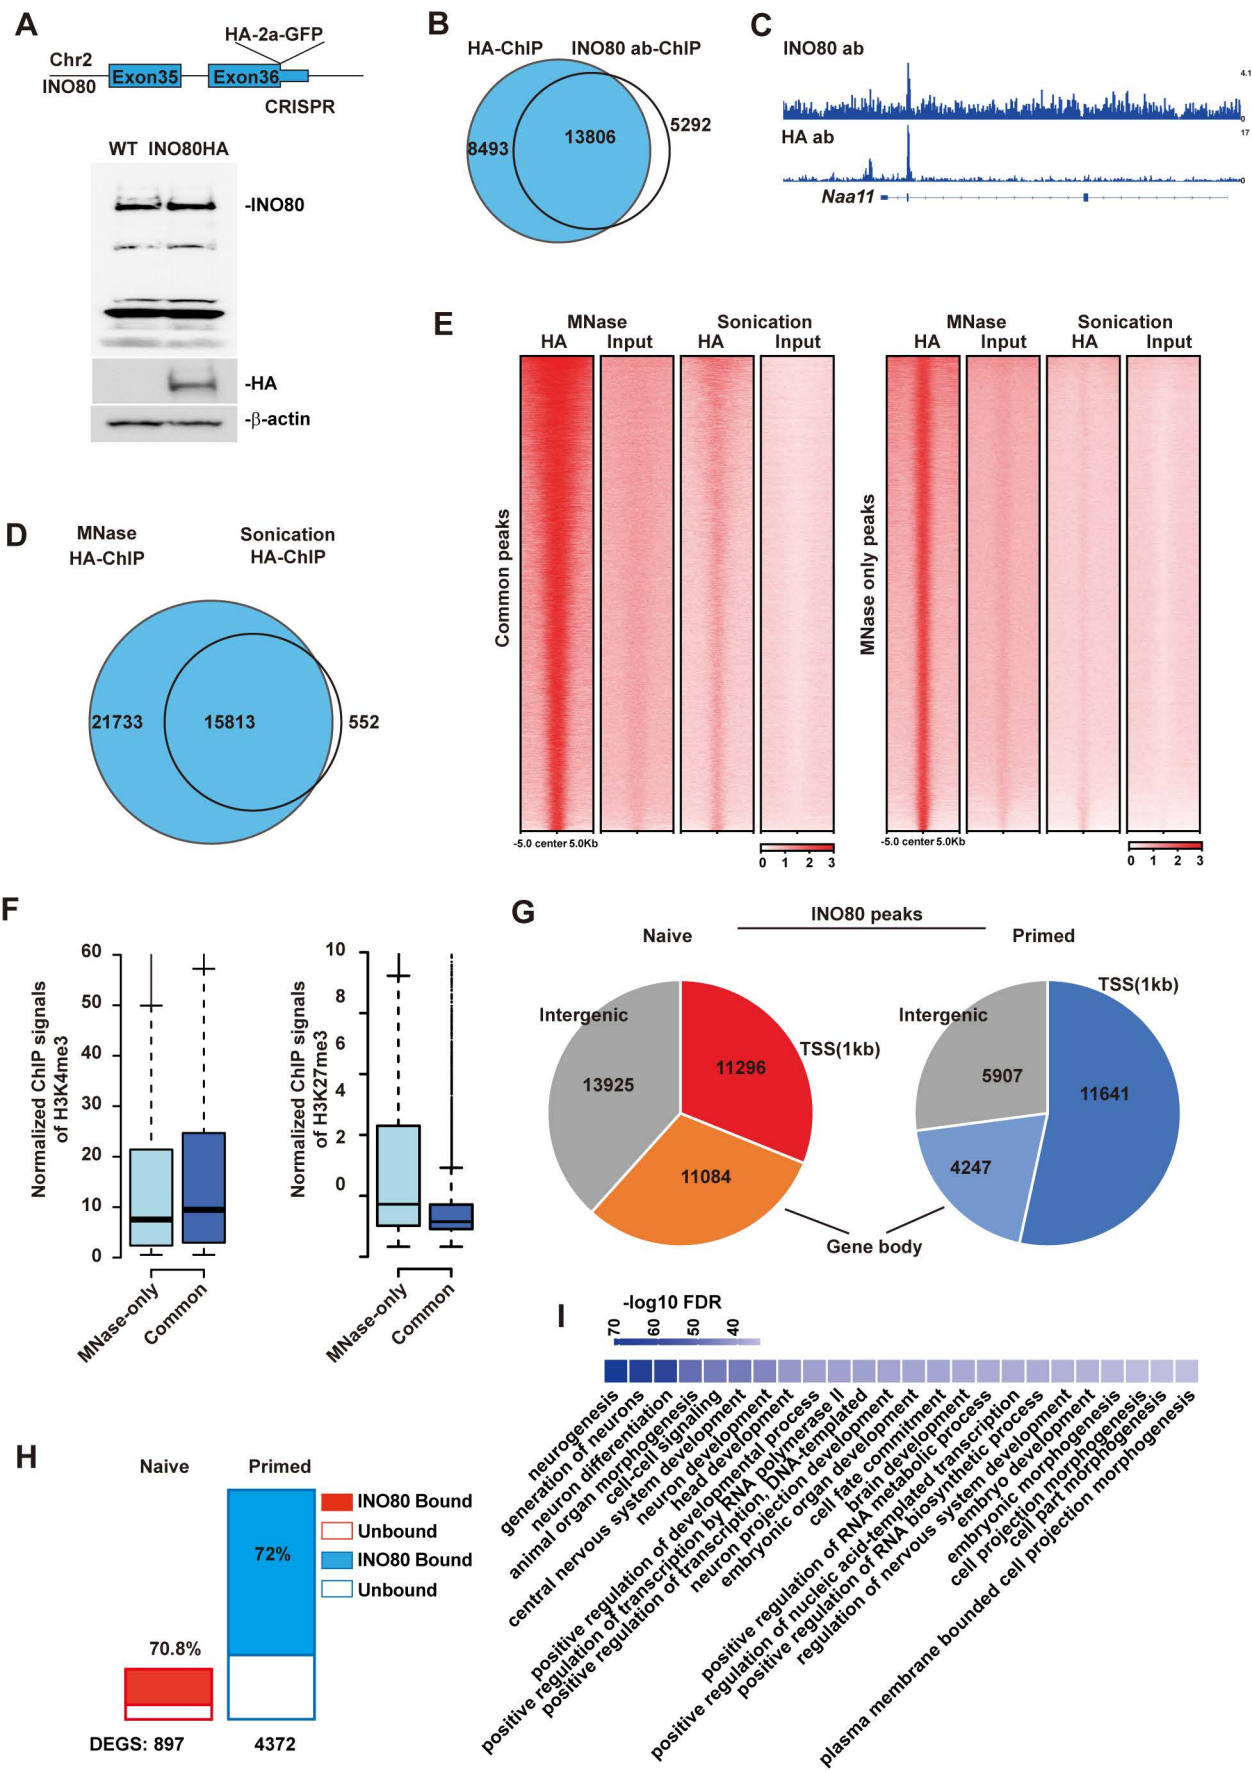

**Figure S3**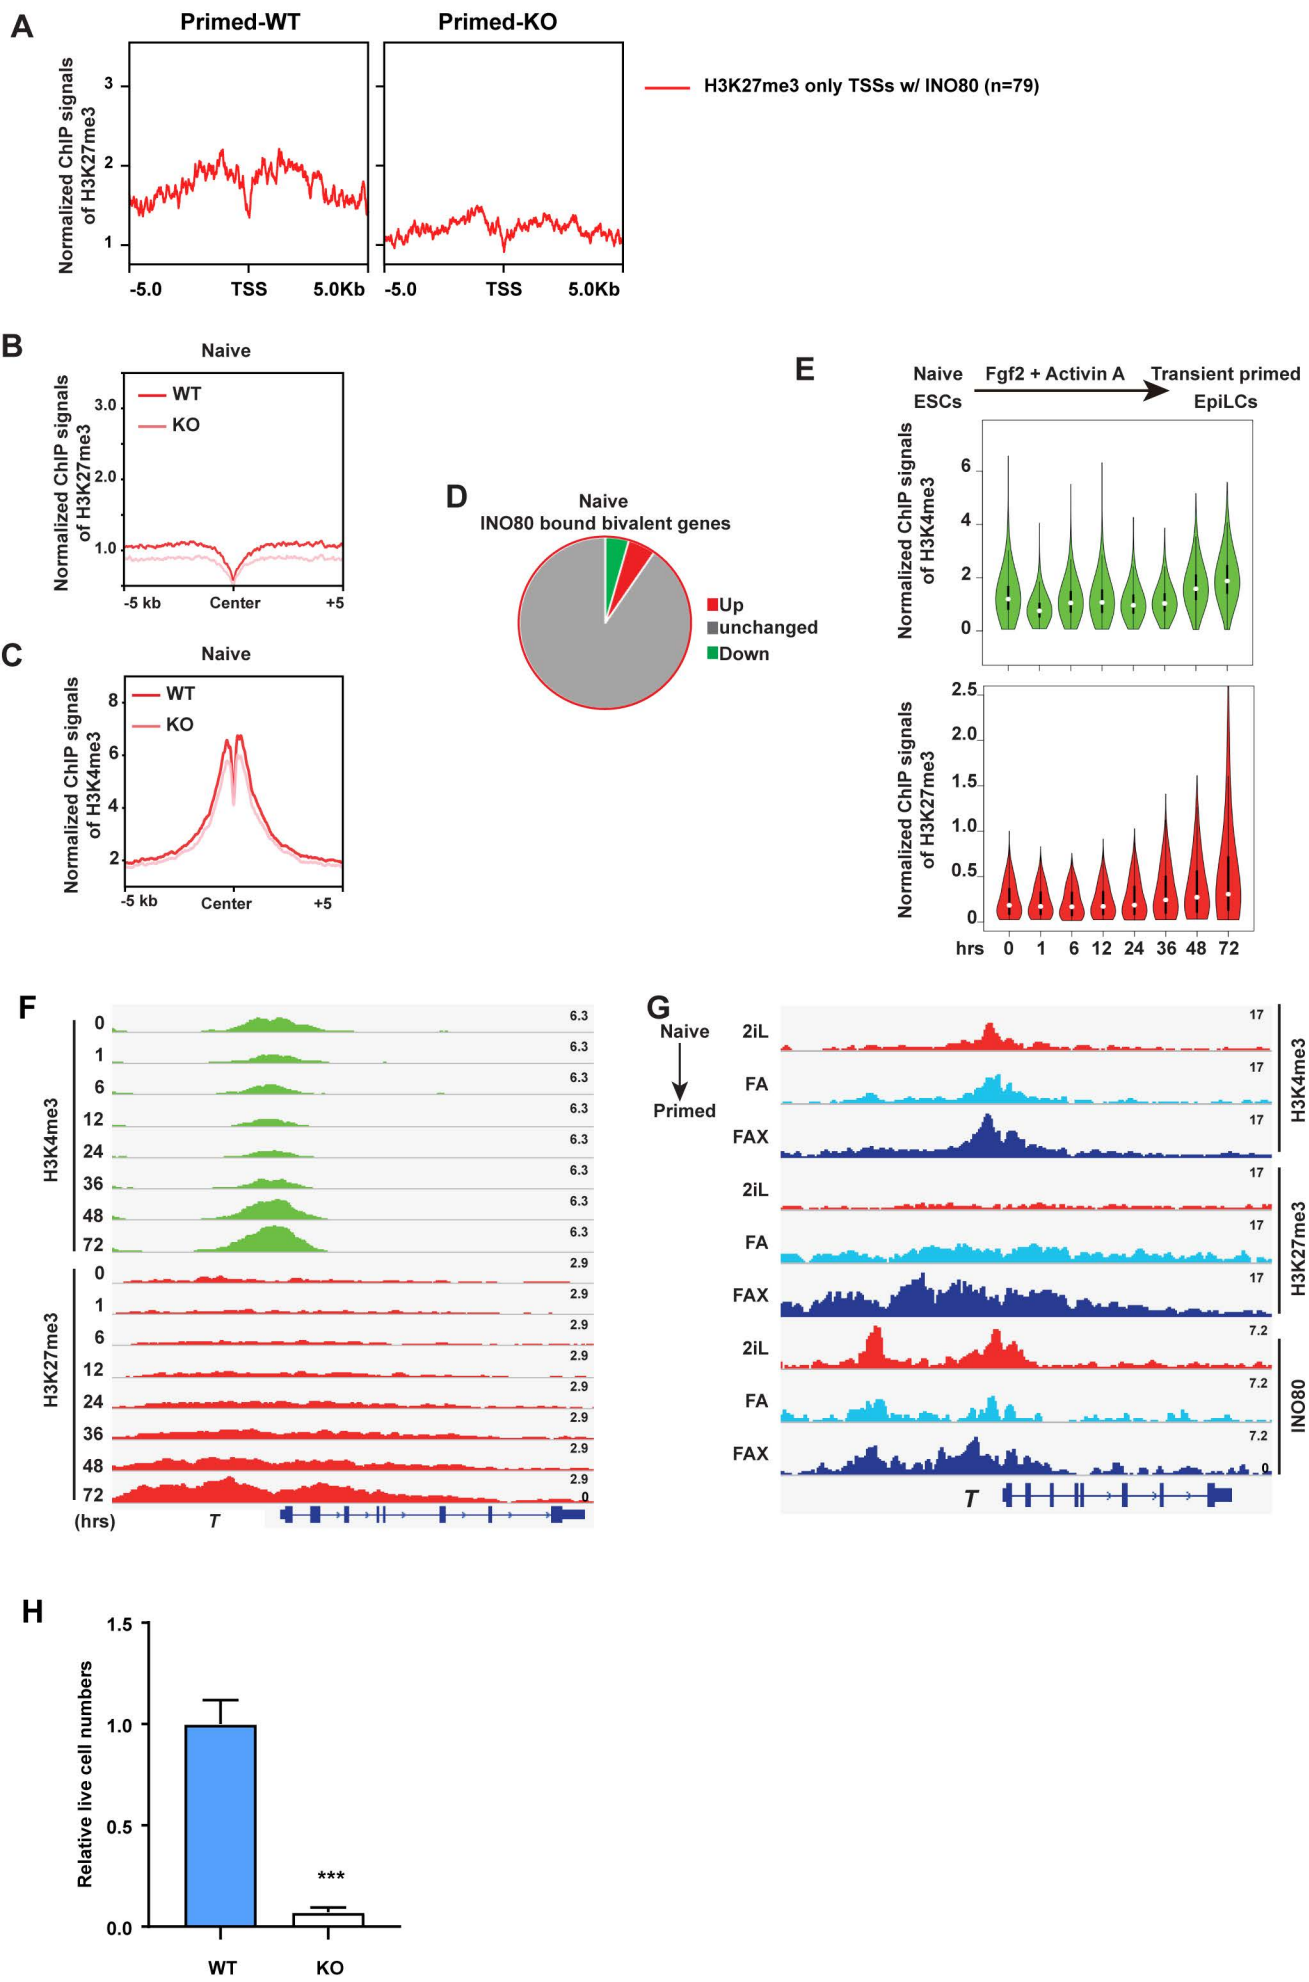

**Figure S4**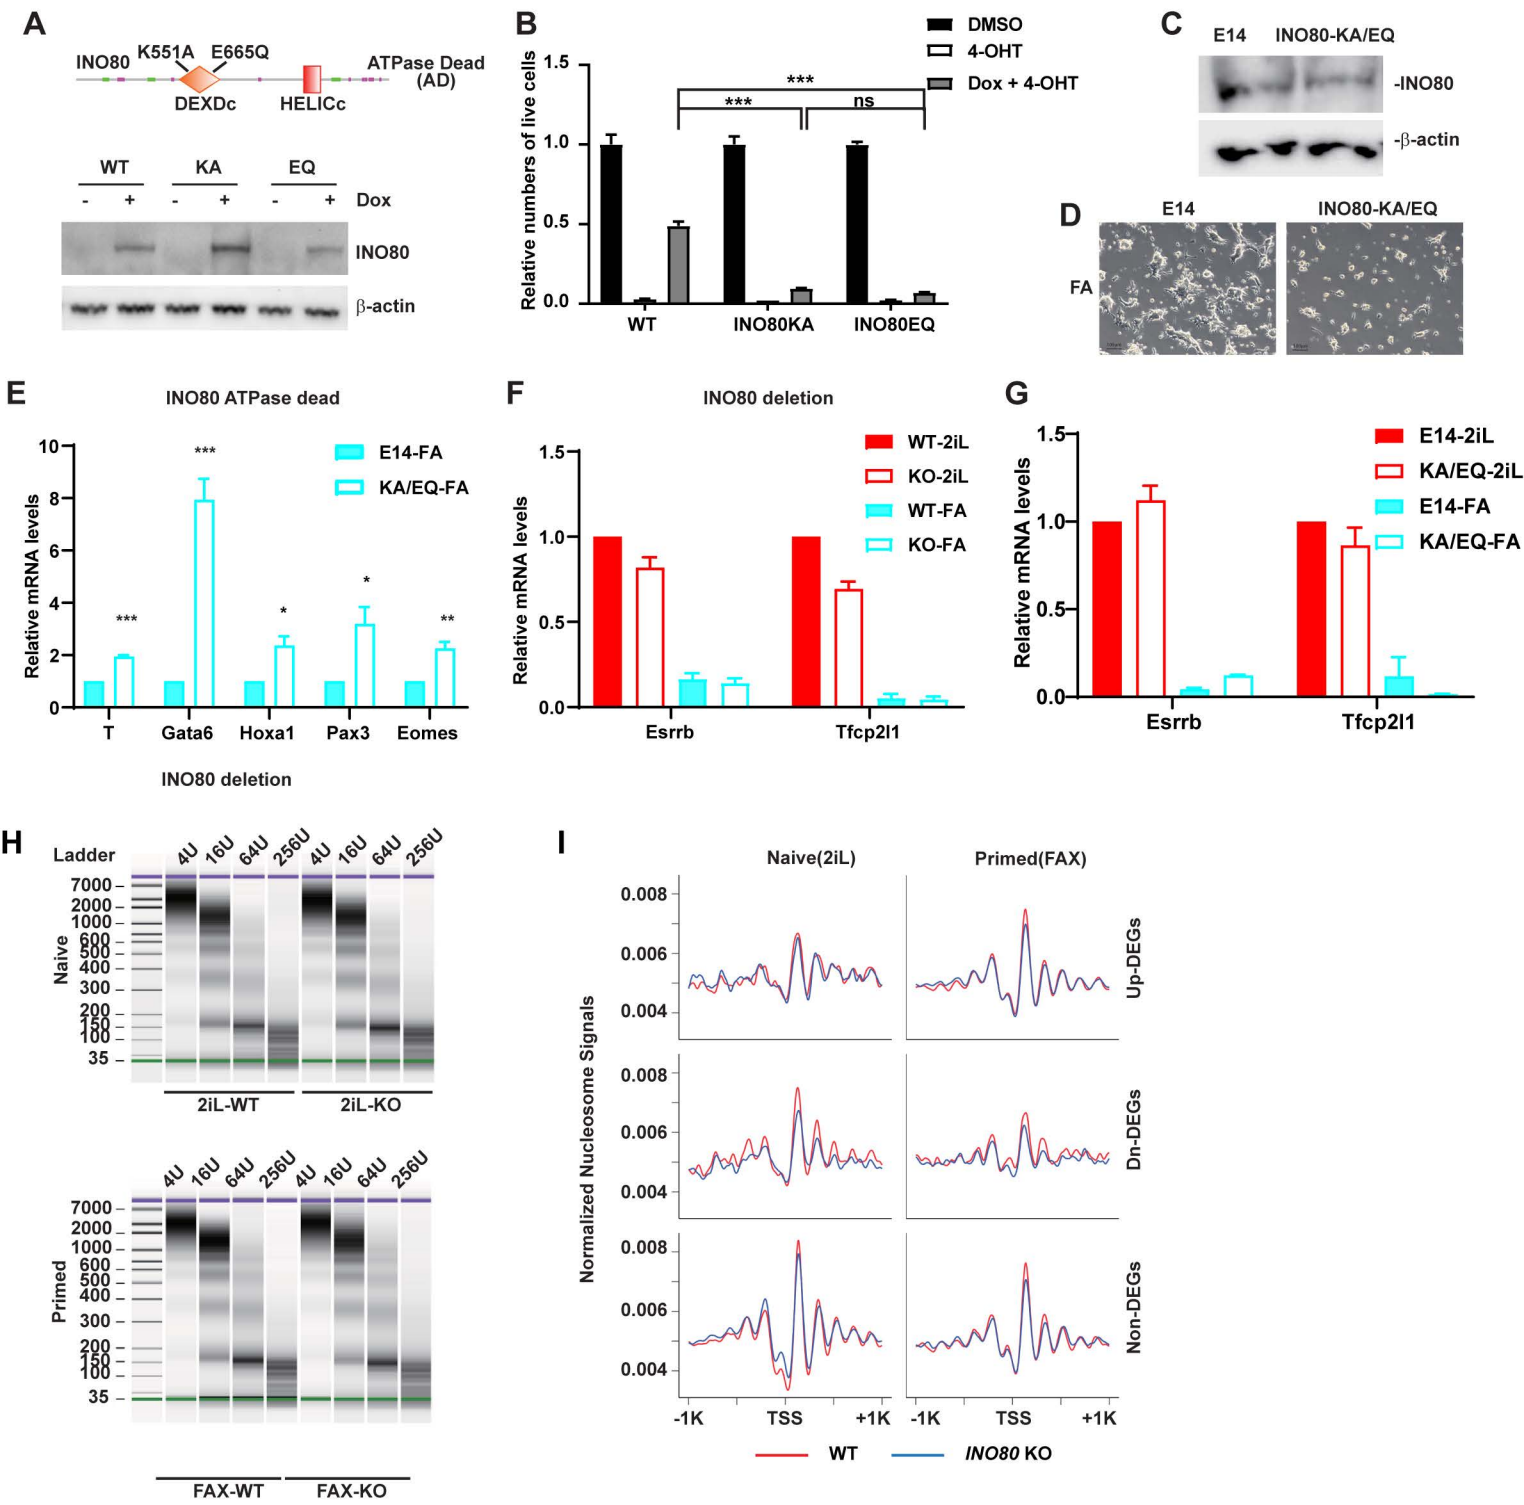



**Figure S5**

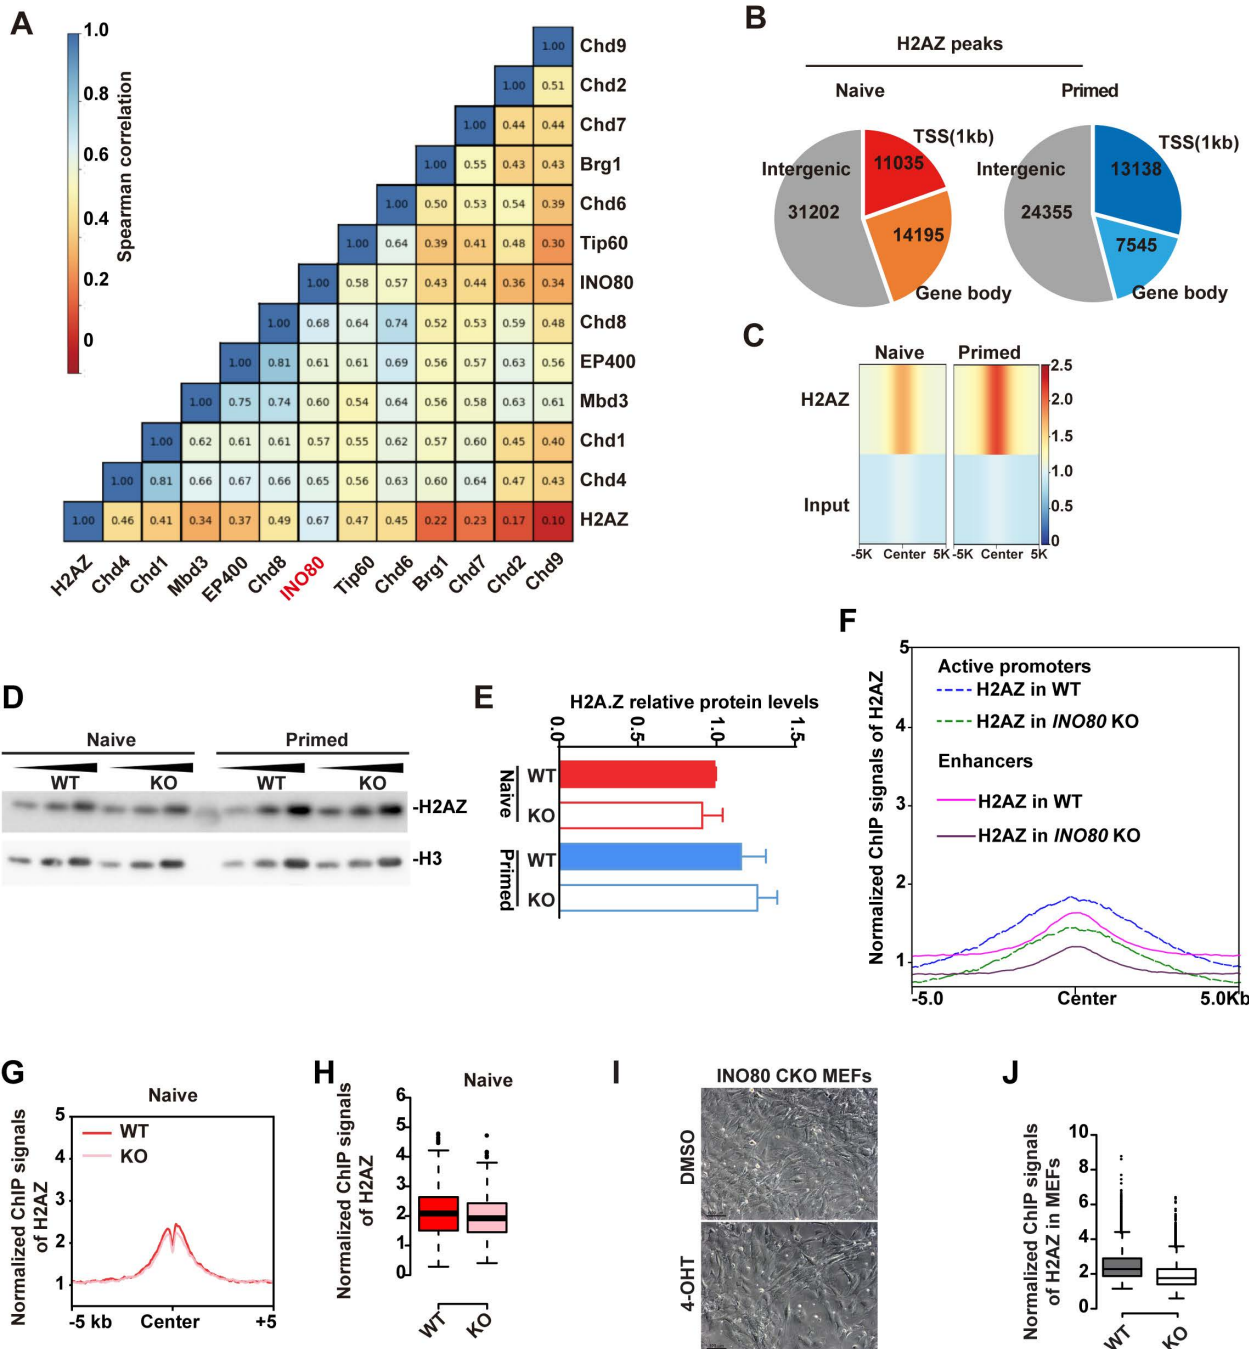



**Figure S6****A**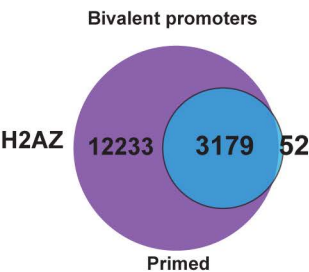**B**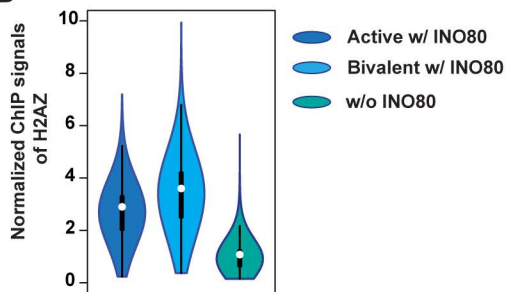**C**

*Rosa26: Cre-ERT; H2az2 $\Delta/\Delta$ ; H2az1 flox/flox*

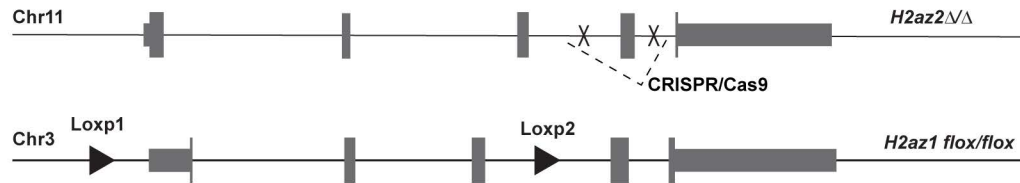**D**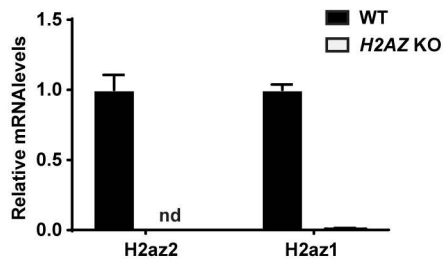**E**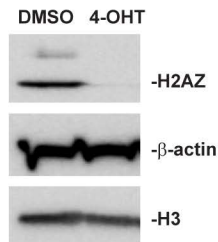**F**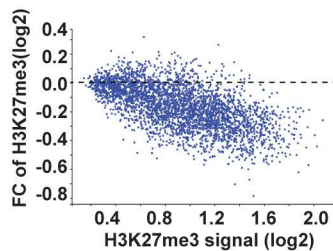

**Figure S7**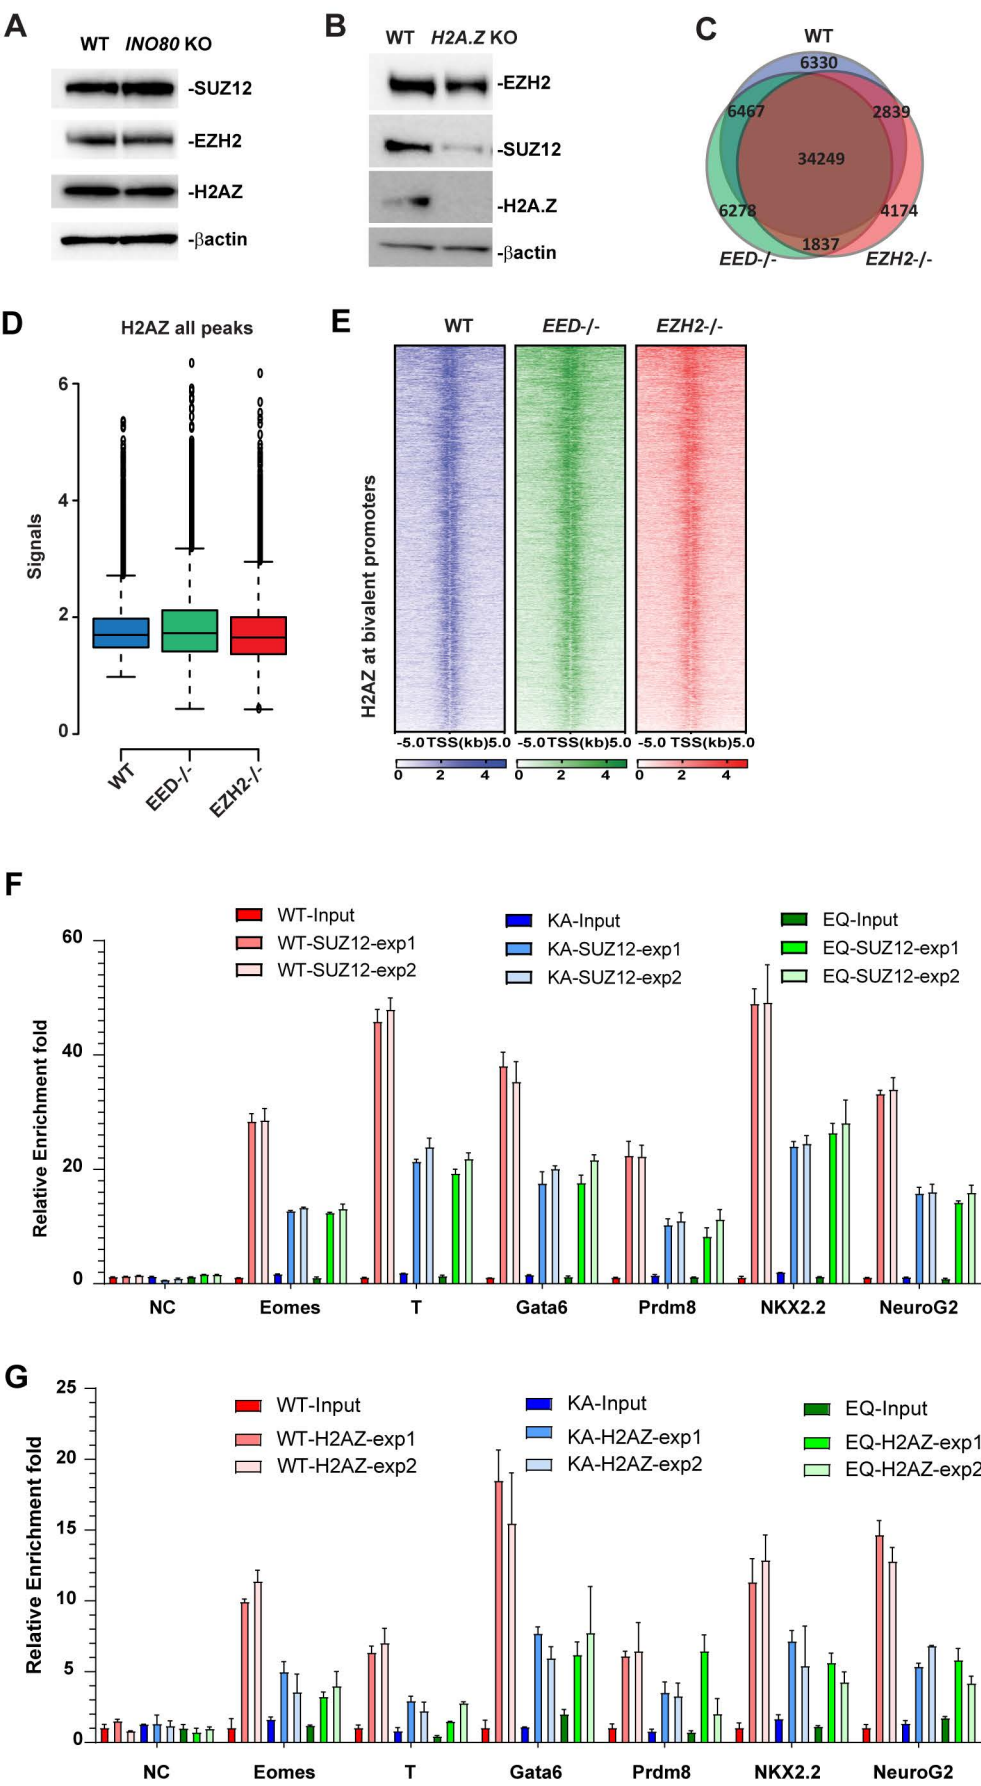

**Table S1: Antibodies used in this study.**

|          | WB | ChIP-seq | Vendor         | Cat#       |
|----------|----|----------|----------------|------------|
| H3       | √  |          | Abcam          | ab1791     |
| Ran      | √  |          | BD             | 610341     |
| b-actin  | √  |          | Sigma          | A5316      |
| INO80    | √  | √        | ProteinTech    | 18810-1-AP |
| HA       | √  | √        | Cell Signaling | #3724      |
| H2AZ     | √  | √        | Active motif   | 39943      |
| EZH2     |    | √        | Cell Signaling | #5246      |
| SUZ12    |    | √        | Cell Signaling | #3737      |
| H3K4me3  |    | √        | Active motif   | 39159      |
| H3K27me3 |    | √        | Active motif   | 39155      |
| H3K27ac  |    | √        | Abcam          | ab4729     |

**Table S2: Primers for RT-qPCR, ChIP-qPCR and oligos for genome targeting.**

| qPCR primers | Forward                 | Reward                  |
|--------------|-------------------------|-------------------------|
| Nanog        | AAGCAGAAGATGCGGACTGT    | ATCTGCTGGAGGCTGAGGTA    |
| Esrrb        | CGATTCATGAAATGCCTCAA    | CCTCCTCGAACTCGGTCA      |
| Fgf5         | GAAAAGACAGGCCGAGAGTG    | GAAGTGGGTGGAGACGTGTT    |
| Ino80        | TTCACAACATGCTTCGATTACAC | AAGCAAGTGGCGCTGTTG      |
| Gapdh        | GTCGTGGAGTCTACTGGTGTC   | GAGCCCTTCCACAATGCCAAA   |
| Nestin       | GACCCTGCTTCTCCTGCTC     | CTGCAGGCCACTGAAAAGTT    |
| Brachy(T)    | CAGCCCACCTACTGGCTCTA    | GAGCCTGGGGTGATGGTA      |
| Eomes        | ACCCGACCTTCCCTGCTATG    | GTGGGCTCATTCTGGATGTC    |
| Gata2        | CTACCACAAGATGAATGGACAGA | TGTCGTCTGACAATTTGCACAAC |
| Gata4        | CATGGCCCCACAATTGAC      | GGAAGACACCCCAATCTCG     |
| Gata6        | TGGCACAGGACAGTCCAAG     | GGTCTCTACAGCAAGATGAATGG |
| H2az1        | GGCCGTATTCATCGACACCT    | GACGAGGGGTGATACGCTTT    |
| H2az2        | TACAGTGCCGCAATTCTGGA    | CTCTTCATCACCGCGGATTG    |
| Hoxa1        | CCTGGAGTGATGTGGTCCAG    | AGCAACCACTGTAGTCCAGC    |
| Hoxa5        | TCCACCCAACTCCCCATTA     | GGGACATGTACTCGGTTCCC    |
| Pax3         | AACCCACTACCCAGACATTTA   | GGCCGGTTGCTAAACCAGAC    |
| Tfcp2l1      | CAGCCCGAACACTACAACCAG   | CAGCCGGATTTCATACTGACTG  |
| Foxa2        | CGAGCTAAAGGGAGCACCT     | TAATGGTGCTCGGGCTTC      |
| Sox9         | ATCTGCACAACGCGGAGCTCA   | CTCTTCTCGCTCTCGTTCAGCAG |
| TBX4         | TCCCCAGCTACAAGGTAAAAGT  | ACCATCCATTGTGTGCACAGAA  |

| sgRNA          |                       |
|----------------|-----------------------|
| H2az2-sg1      | ACACGTACACAGGAAAAACC  |
| H2az2-sg2      | TGTAGCACATTTAACACGTA  |
| H2az1-loxp1sg  | AGAGGCGCCGGTTGTCAGCG  |
| H2az1-loxp2sg  | TGCAATTGCGTGCCCCCTTCG |
| INO80-HAStopsg | CCTCTGGAGGACGGTAACCA  |
| INO80KAsg      | CTTGCTGATGAAATGGGTCT  |
| INO80EQsg      | CATGGTACTGGATGAAGCTC  |

| ChIP primer | Forward               | Reward                  |
|-------------|-----------------------|-------------------------|
| negative    | ACCTAGTCCTAGCCAAGCCA  | TGTGGCATCTGGCTCATCTG    |
| Prdm8       | CACGAAATCGTTCACGCCTC  | TATCGCATGCATCAGGGGTC    |
| T           | TACTTCAAAGGGTGTCCCGC  | AGGCGCGACAAGAGTAAGTC    |
| Gata6       | GGGCGCTTCGTGAGTAGTTA  | ATTAAGCGCCCGACATTCCA    |
| Hoxa1       | GTCGATGGTACTCAACGCCA  | CCTACTACGACAGCTCAGCG    |
| Nkx2.2      | TCGTAGGTCTGCGCTTTGGAG | GACGAGTCACCGGACAATGACAA |



**Table S3. Software and Algorithms**

|                                |                                         |                                                                                                                                                                                       |
|--------------------------------|-----------------------------------------|---------------------------------------------------------------------------------------------------------------------------------------------------------------------------------------|
| Bowtie (v1.1.2)                | (Langmead et al., 2009)                 | <a href="http://bowtie-bio.sourceforge.net/bowtie2/index.shtml">http://bowtie-bio.sourceforge.net/bowtie2/index.shtml</a>                                                             |
| Cutadapt (v1.9)                | (Martin, 2011)                          | <a href="https://cutadapt.readthedocs.io/en/v1.9/installation.html">https://cutadapt.readthedocs.io/en/v1.9/installation.html</a>                                                     |
| Samtools (v1.3.1)              | (Li et al., 2009)                       | <a href="http://samtools.sourceforge.net/">http://samtools.sourceforge.net/</a>                                                                                                       |
| Bedtools (v2.21.0)             | (Quinlan, 2014)                         | <a href="https://bedtools.readthedocs.io/en/latest/">https://bedtools.readthedocs.io/en/latest/</a>                                                                                   |
| Deeptools (v3.3.0)             | (Ramirez et al., 2016)                  | <a href="https://deeptools.readthedocs.io/en/develop/">https://deeptools.readthedocs.io/en/develop/</a>                                                                               |
| STAR (v2.5.2b)                 | (Dobin et al., 2013)                    | <a href="https://github.com/alexdobin/STAR">https://github.com/alexdobin/STAR</a>                                                                                                     |
| DESeq2 1.16.1                  | (Love et al., 2014)                     | <a href="https://bioconductor.org/packages/release/bioc/html/DESeq2.html">https://bioconductor.org/packages/release/bioc/html/DESeq2.html</a>                                         |
| normalize.loess R affy package | (Cleveland, 1992; Gautier et al., 2004) | <a href="https://www.rdocumentation.org/packages/affy/versions/1.50.0/topics/normalize.loess">https://www.rdocumentation.org/packages/affy/versions/1.50.0/topics/normalize.loess</a> |
| bedGraphToBigWig               | (Kent et al., 2010)                     | <a href="https://www.encodeproject.org/software/bedgraphtobigwig/">https://www.encodeproject.org/software/bedgraphtobigwig/</a>                                                       |
| R 3.3.0                        | R Development Core Team, 2016           | <a href="https://www.r-project.org/">https://www.r-project.org/</a>                                                                                                                   |
| BoxplotR                       | (Spitzer et al., 2014)                  | <a href="https://github.com/VizWizard/BoxPlotR.shiny/blob/master/README.md">https://github.com/VizWizard/BoxPlotR.shiny/blob/master/README.md</a>                                     |

**Reference for software and algorithms**

- Cleveland, W.S., Grosse, E., Shyu, W.M. (1992). Statistical Models in S. In Local regression models, J.M. Chambers, Hastie, T.J., ed. (Wadsworth & Brooks/Cole).
- Dobin, A., Davis, C.A., Schlesinger, F., Drenkow, J., Zaleski, C., Jha, S., Batut, P., Chaisson, M., and Gingeras, T.R. (2013). STAR: ultrafast universal RNA-seq aligner. *Bioinformatics* 29, 15-21.
- Gautier, L., Cope, L., Bolstad, B.M., and Irizarry, R.A. (2004). affy--analysis of Affymetrix GeneChip data at the probe level. *Bioinformatics* 20, 307-315.
- Kent, W.J., Zweig, A.S., Barber, G., Hinrichs, A.S., and Karolchik, D. (2010). BigWig and BigBed: enabling browsing of large distributed datasets. *Bioinformatics* 26, 2204-2207.
- Langmead, B., Trapnell, C., Pop, M., and Salzberg, S.L. (2009). Ultrafast and memory-efficient alignment of short DNA sequences to the human genome. *Genome Biology* 10, R25.
- Li, H., Handsaker, B., Wysoker, A., Fennell, T., Ruan, J., Homer, N., Marth, G., Abecasis, G., Durbin, R., and Genome Project Data Processing, S. (2009). The Sequence Alignment/Map format and SAMtools. *Bioinformatics* 25, 2078-2079.
- Love, M.I., Huber, W., and Anders, S. (2014). Moderated estimation of fold change and dispersion for RNA-seq data with DESeq2. *Genome Biology* 15.
- Martin, M. (2011). Cutadapt removes adapter sequences from high-throughput sequencing reads. 2011 17, 3 %J EMBnet.journal.
- Quinlan, A.R. (2014). BEDTools: The Swiss-Army Tool for Genome Feature Analysis. *Curr Protoc Bioinformatics* 47, 11 12 11-34.
- Ramirez, F., Ryan, D.P., Gruning, B., Bhardwaj, V., Kilpert, F., Richter, A.S., Heyne, S., Dundar, F., and Manke, T. (2016). deepTools2: a next generation web server for deep-sequencing data analysis. *Nucleic Acids Res* 44, W160-165.
- Spitzer, M., Wildenhain, J., Rappsilber, J., and Tyers, M. (2014). BoxPlotR: a web tool for generation of box plots. *Nat Methods* 11, 121-122.
